# Supplementary material for: Proton Pump Inhibitors in Pediatric Gastroesophageal Reflux Disease: A Systematic Review of Randomized Controlled Trials
Source: MDPI journal article supplement (doi:10.3390/children11030296), 2024-03-01
Supplement: s1 [file s1]

**Supplementary Table S1.** Full-text articles assessed for eligibility but not included in the review

| Reference                          | Type Study                | Aims/Intervention                                                                                                                                                                                                                                 | Age      | Reason of exclusion                       |
|------------------------------------|---------------------------|---------------------------------------------------------------------------------------------------------------------------------------------------------------------------------------------------------------------------------------------------|----------|-------------------------------------------|
| <b>Bestebreurtje P et al. 2020</b> | Clinical trial            | To study the efficacy and pharmacokinetics of rectally administered omeprazole in infants with gastroesophageal reflux disease due to esophageal atresia or congenital diaphragmatic hernia and compare these with orally administered omeprazole | Children | Children with a pathology other than GERD |
| <b>Chiang HH et al. 2019</b>       | Randomized Clinical Trial | To compare the clinical efficacy of single doses of dexlansoprazole [modified-release 60 mg] and esomeprazole [40 mg] after 24-week follow-up in patients with mild erosive esophagitis                                                           | Adults   | Population                                |
| <b>Johnson DA et al. 2016</b>      | Clinical Trial            | To identify clinical factors related to resolution of reflux-related sleep disturbance in subjects treated with esomeprazole 20 mg for 14 days                                                                                                    | Adults   | Population                                |
| <b>Steingoetter A et al 2015</b>   | Randomized Clinical Trial | To assess the effect of proton pump inhibitor therapy on the volume, distribution and acidity of gastric secretions in GERD and healthy subjects                                                                                                  | Adults   | Population Outcome                        |
| <b>Hatlebakk JG et al. 2016</b>    | Clinical Trial            | To compare the ability of laparoscopic antireflux surgery and esomeprazole to control esophageal acid exposure, over a 5-year period, in patients with chronic gastroesophageal reflux disease                                                    | Adults   | Population                                |
| <b>Walker D et al. 2015</b>        | Randomized Clinical Trial | To assess the clinical superiority of Zegerid versus Losec for rapid relief of heartburn associated with gastro-esophageal reflux disease                                                                                                         | Adults   | Population                                |

| Reference                          | Type Study                  | Aims/Intervention                                                                                                                                                     | Age    | Reason of exclusion |
|------------------------------------|-----------------------------|-----------------------------------------------------------------------------------------------------------------------------------------------------------------------|--------|---------------------|
| <b>Moraes-Filho JP et al. 2014</b> | Clinical Trial              | To compare the efficacy of pantoprazole-Mg and esomeprazole in GERD                                                                                                   | Adults | Population          |
| <b>Peura DA et al. 2013</b>        | Randomized Clinical Trial   | To determine the impact of PPI therapy on heartburn and regurgitation severity in patients with either non-erosive GERD or erosive oesophagitis                       | Adults | Population          |
| <b>Xiao YL et al. 2013</b>         | Randomized Clinical Trial   | To investigate whether hydrotalcite was comparable to esomeprazole, a proton pump inhibitor, in on-demand therapy for non-erosive reflux disease                      | Adults | Population          |
| <b>Flook NW et al. 2013</b>        | Randomized Clinical Trial   | To evaluate the efficacy of esomeprazole in primary-care treatment of patients with unexplained chest pain stratified for frequency of reflux/regurgitation symptoms. | Adults | Population          |
| <b>Pouchain D et al. 2012</b>      | Randomized Clinical Trial   | To compare short-term efficacy of an alginate [Gaviscon®, 4 × 10 mL/day] and omeprazole [20 mg/day] on GERD symptoms in general practice                              | Adults | Population          |
| <b>Tan VP et al. 2011</b>          | Randomized Clinical Trial   | To study esomeprazole for the treatment of non-erosive reflux disease in Chinese patients                                                                             | Adults | Population          |
| <b>Dabholkar AH et al.</b>         | Randomized open-label study | To assess the 12-month safety of dexlansoprazole MR in patients with symptomatic gastro-oesophageal reflux disease                                                    | Adults | Population          |
| <b>Johnson D et al. 2010</b>       | Randomized Clinical Trial   | To evaluate the efficacy of esomeprazole on GERD-related nighttime heartburn and associated sleep disturbances.                                                       | Adults | Population          |
